# Supplementary material
Source: PubMed Central journal article supplement (PMC11558357)
Supplement: ajtr0016-5248-f11.pdf [file ajtr0016-5248-f11.pdf]

## The role of ERPs and IVA-CPT in ADHD diagnosis

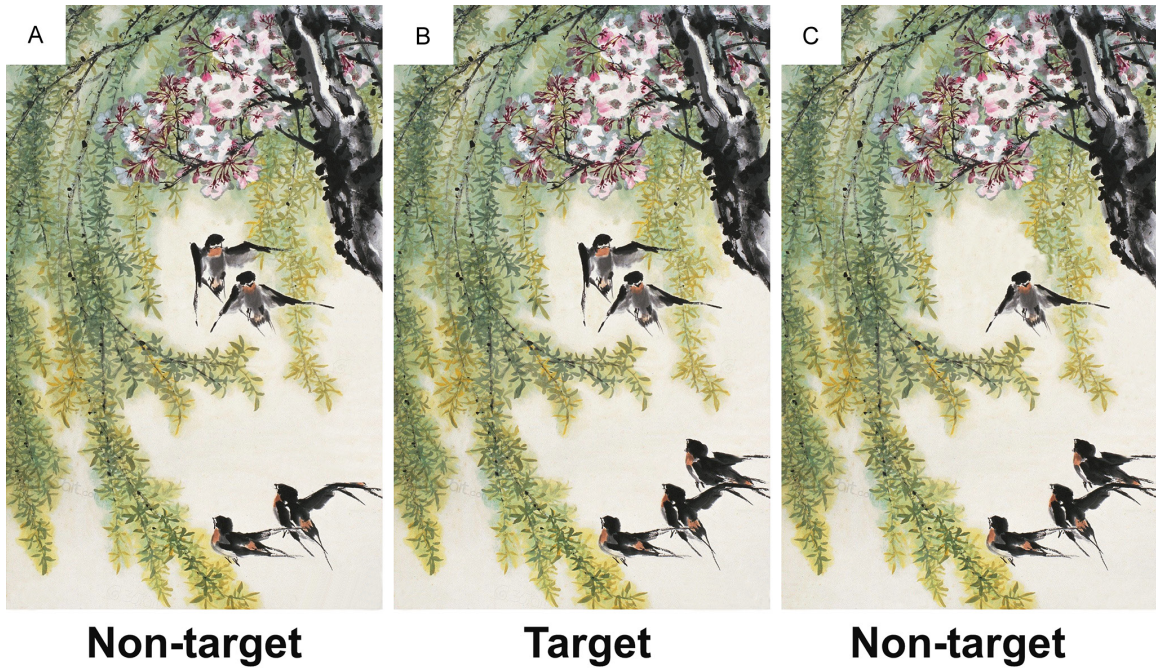

**Figure S1.** Three pictures of the low-difficulty condition of P300. (A, C) The pictures both A and C had four birds, but in different positions. (B) The picture had five birds.

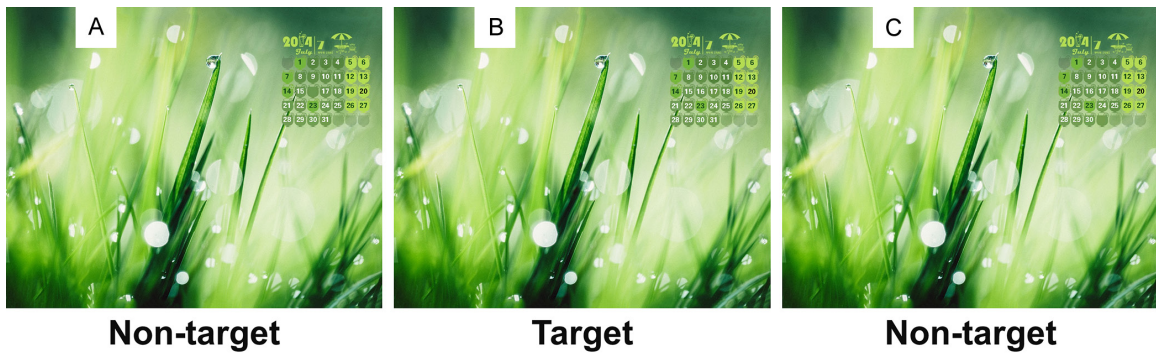

**Figure S2.** Three pictures of the high-difficulty condition of P300. A. The picture had the number 16 removed. B. The picture was without modification. C. The picture had the number 31 removed.
